# Supplementary material
Source: MDPI journal article supplement (https://www.mdpi.com/2071-1050/11/7/1854)
Supplement: s1 [file s1]

## Supplementary material

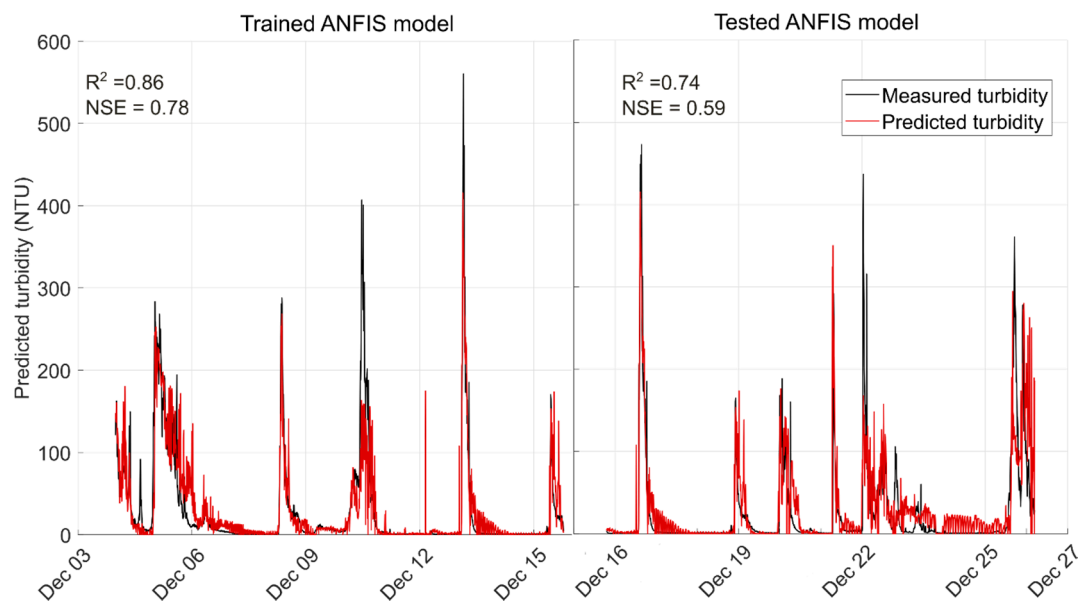

**Figure S1.** Measured vs predicted turbidity for training and testing period in ANFIS model.

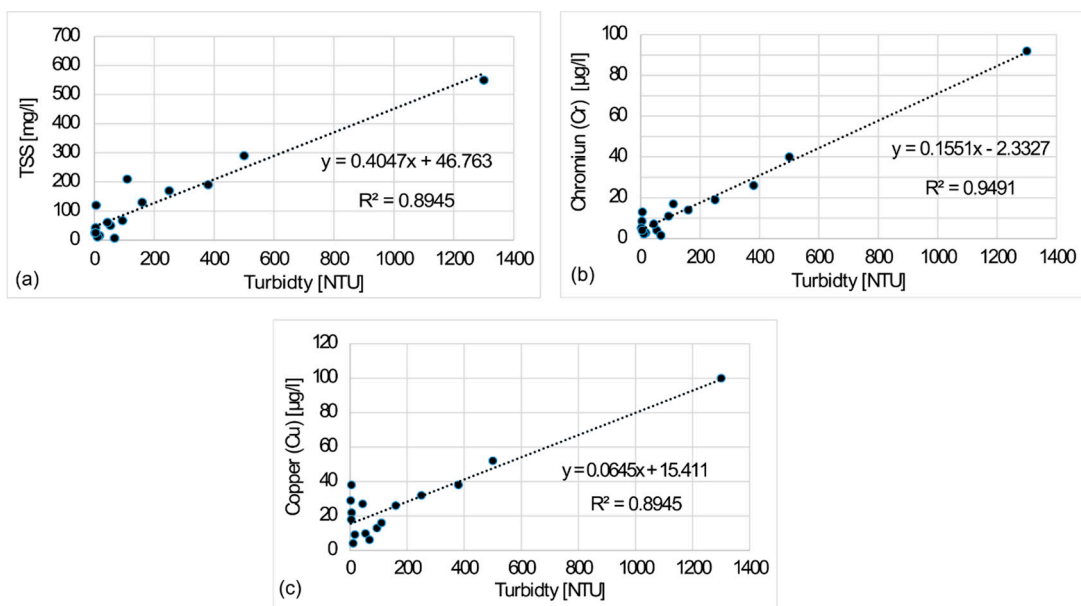

**Figure S2.** Correlation between turbidity and total suspended solids (a), concentration of chromium (b) and concentration of copper (c).
